# Supplementary material for: Length of Nutritional Transition Associates Negatively with Postnatal Growth in Very Low Birthweight Infants
Source: MDPI journal article supplement (doi:10.3390/nu13113961), 2021-11-06
Supplement: s1 [file s1]

Table S1. Clinical characteristics of girls and boys according to the transition phase length quartiles.

|                                        | Girls (n=117)                           |                                                |                                           |                   | Boys (n=131)                            |                                                |                                           |                   |
|----------------------------------------|-----------------------------------------|------------------------------------------------|-------------------------------------------|-------------------|-----------------------------------------|------------------------------------------------|-------------------------------------------|-------------------|
|                                        | Short<br>Transition<br>ad 7 d<br>(n=31) | Intermediate<br>Transition<br>8-12 d<br>(n=64) | Long<br>Transition<br>over 12 d<br>(n=22) | p-value           | Short<br>Transition<br>ad 7 d<br>(n=23) | Intermediate<br>Transition<br>8-12 d<br>(n=68) | Long<br>Transition<br>over 12 d<br>(n=40) | p-value           |
| <b>Clinical characteristics, n (%)</b> |                                         |                                                |                                           |                   |                                         |                                                |                                           |                   |
| Bronchopulmonary dysplasia             | 8 (25.8)                                | 33 (51.6)                                      | 11 (50)                                   | 0.05 <sup>a</sup> | 16 (69.6)                               | 37 (54.4)                                      | 22 (55.0)                                 | 0.42 <sup>a</sup> |
| Respiratory distress syndrome          | 20 (64.5)                               | 44 (68.8)                                      | 15 (68.2)                                 | 0.9 <sup>a</sup>  | 17 (73.9)                               | 46 (67.6)                                      | 26 (65.0)                                 | 0.9 <sup>a</sup>  |
| Patent ductus arteriosus               | 19 (61.3)                               | 46 (71.9)                                      | 15 (68.3)                                 | 0.6 <sup>a</sup>  | 14 (60.9)                               | 46 (67.6)                                      | 25 (62.5)                                 | 0.8 <sup>a</sup>  |
| Sepsis                                 | 5 (16.1)                                | 12 (18.8)                                      | 6 (27.3)                                  | 0.6 <sup>a</sup>  | 8 (34.8)                                | 13 (19.1)                                      | 15 (37.5)                                 | 0.6 <sup>a</sup>  |
| Severe IVH (grade III or IV)           | 4 (12.9)                                | 8 (12.5)                                       | 1 (4.5)                                   | 0.7 <sup>b</sup>  | 4 (17.4)                                | 9 (13.2)                                       | 1 (2.5)                                   | 0.08 <sup>b</sup> |
| Discharged before 42 weeks of<br>PMA   | 24 (87.1)                               | 46 (71.9)                                      | 15 (68.2)                                 | 0.2 <sup>a</sup>  | 17 (73.9)                               | 51 (75.0)                                      | 28 (70.0)                                 | 0.7 <sup>a</sup>  |

IVH = intraventricular hemorrhage, PMA = postmenstrual age, a = chi-squared test, b=Fisher's exact test.
