# Supplementary figures and images for: Length of Nutritional Transition Associates Negatively with Postnatal Growth in Very Low Birthweight Infants
Source: MDPI journal article supplement (doi:10.3390/nu13113961), 2021-11-06

— Enteral — Parenteral — Total

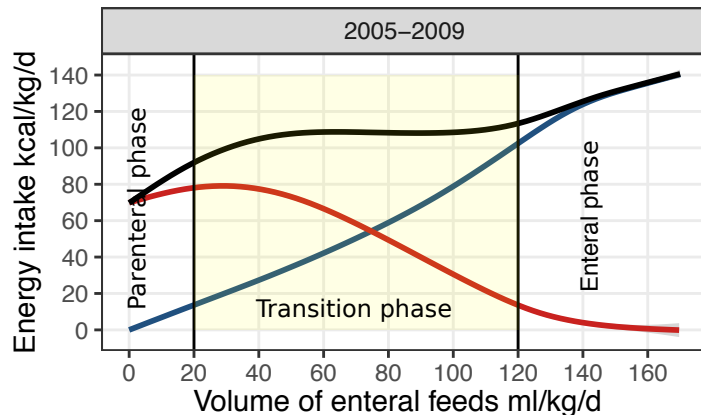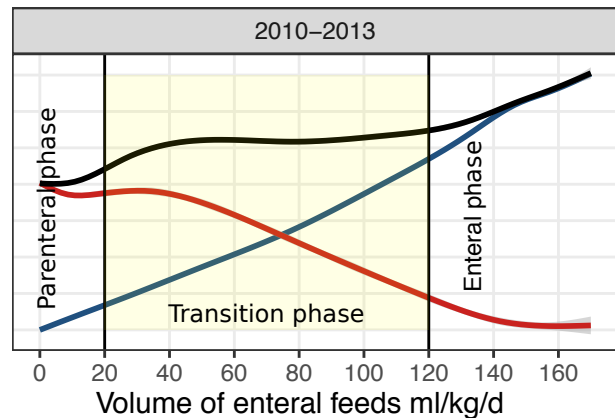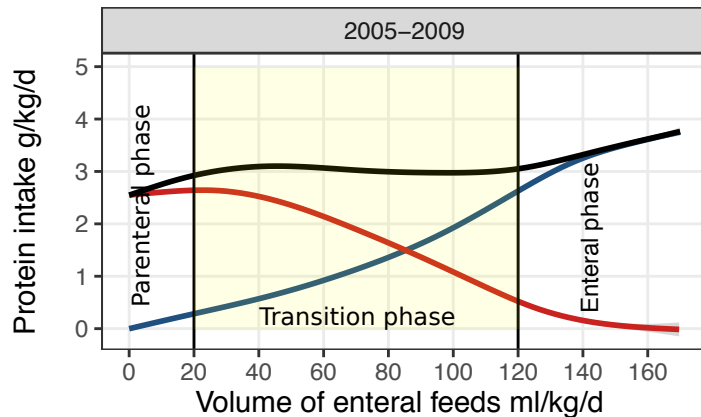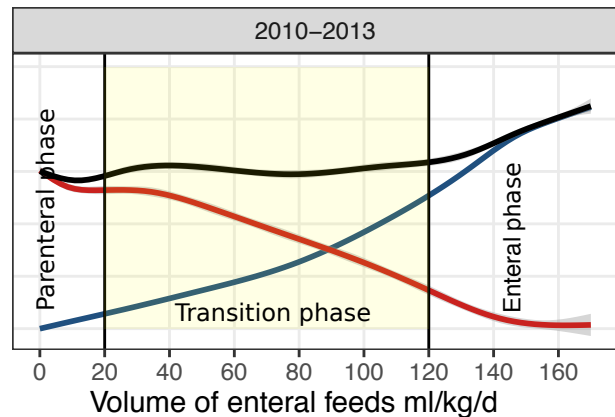

Supplement: s1 [file s1]
